# Supplementary material for: A general theory on frequency and time–frequency analysis of irregularly sampled time series based on projection methods – Part 1: Frequency analysis
Source: Copernicus journal article supplement (doi:10.5194/npg-25-145-2018), 2018-03-05
Supplement: Supplementary file 1 [file npg-25-145-2018-supplement.zip]

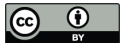

## *Supplement of*

# **A general theory on frequency and time–frequency analysis of irregularly sampled time series based on projection methods – Part 1: Frequency analysis**

**Guillaume Lenoir and Michel Crucifix**

*Correspondence to:* Guillaume Lenoir ([guillaume.lenoir@hotmail.com](mailto:guillaume.lenoir@hotmail.com))

- `npg-25-145-2018-supplement-title-page.pdf`
- `__MACOSX`
  - `supplementary_material`
    - \* `._.DS_Store`
    - \* `code`
    - \* `figures`
- `supplementary_material`
  - `.DS_Store`
  - `code`
    - \* `.DS_Store`
    - \* `.ipynb_checkpoints`
    - \* `CPU_elixir`
    - \* `Example_with_ODP1148.ipynb`
    - \* `ODP1148_sensitivity_background_noise.py`
    - \* `README.txt`
    - \* `analytical_variance_periodogram_red_noise.py`
    - \* `approx_Lomb_generalized.py`
    - \* `data`
    - \* `gen_car1_wv33.py`
    - \* `gen_car1_wv33.pyc`
    - \* `periodogram_plus_mean.py`
    - \* `tapering_window_wv33.py`
    - \* `tapering_window_wv33.pyc`
  - `figures`
    - \* `.DS_Store`

- \* CPU
- \* LS\_projection\_framed.png
- \* ODP1148\_example
- \* anal\_variance\_rn.pdf
- \* approx\_Lomb\_generalized.pdf
- \* periodogram\_and\_mean.pdf

The copyright of individual parts of the supplement might differ from the CC BY 4.0 License.
