# Supplementary figures and images for: A general theory on frequency and time–frequency analysis of irregularly sampled time series based on projection methods – Part 1: Frequency analysis
Source: Copernicus journal article supplement (doi:10.5194/npg-25-145-2018), 2018-03-05

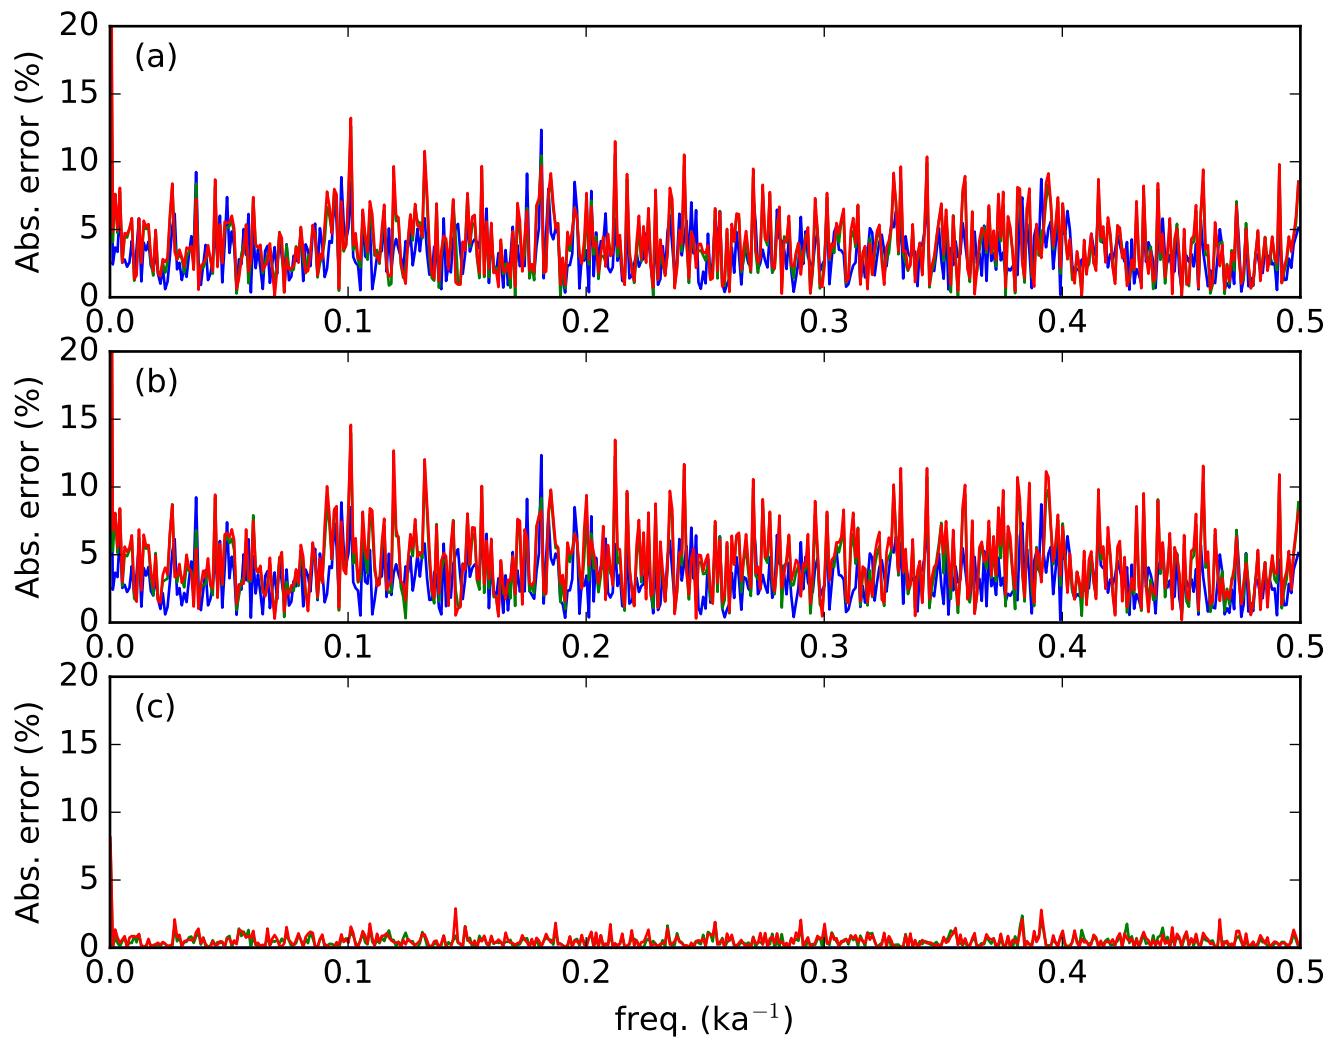

Supplement: Supplementary file 2 [file npg-25-145-2018-supplement.zip]

Data and trend

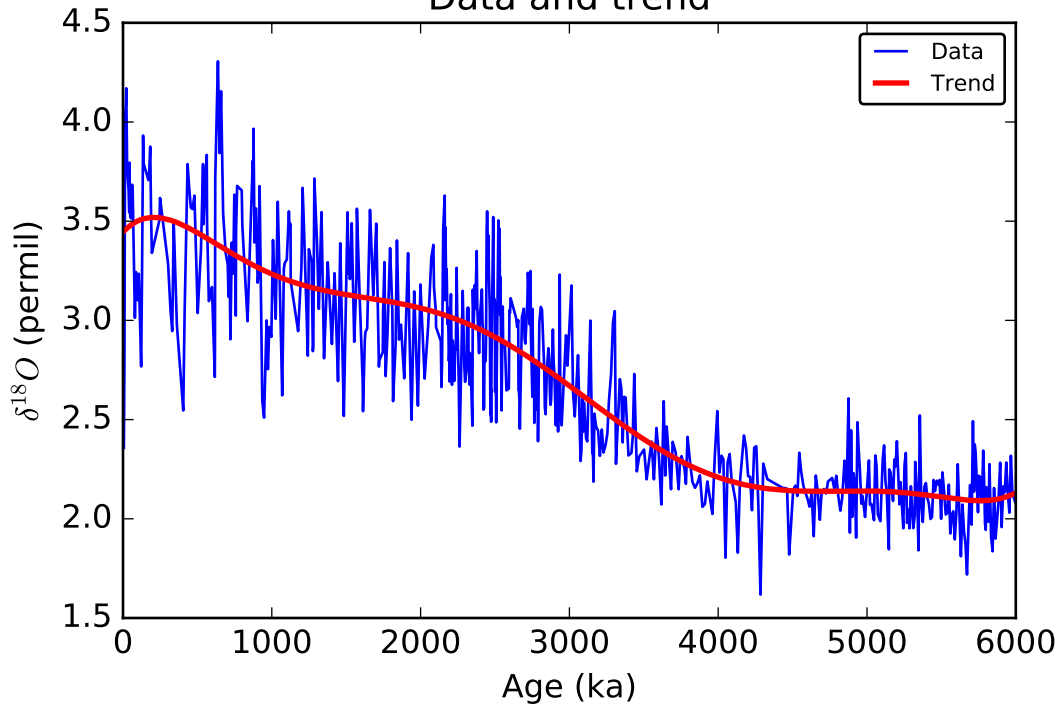

Supplement: Supplementary file 3 [file npg-25-145-2018-supplement.zip]

Squared amplitude vs weighted periodogram

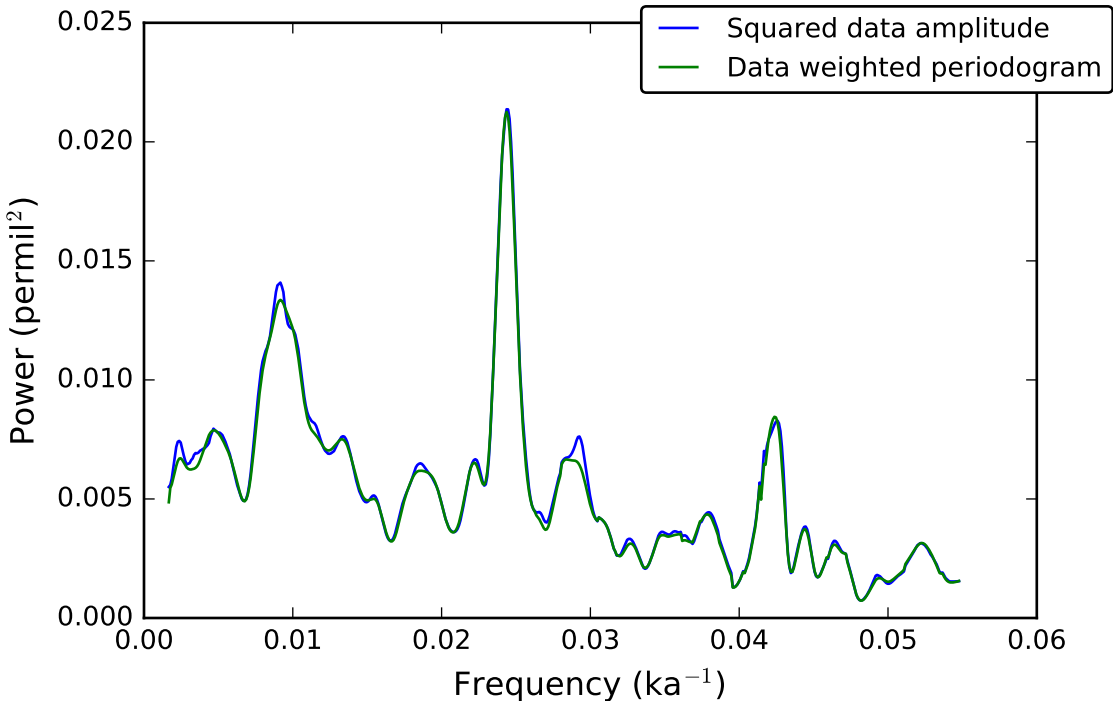

Supplement: Supplementary file 4 [file npg-25-145-2018-supplement.zip]

Marginal distribution of the process variance

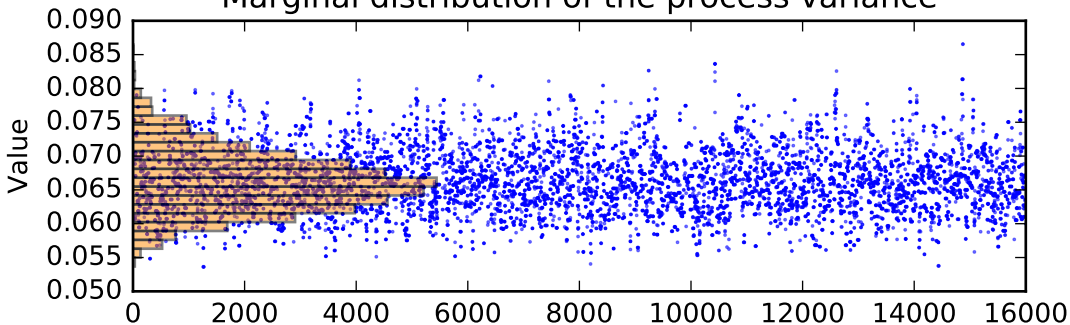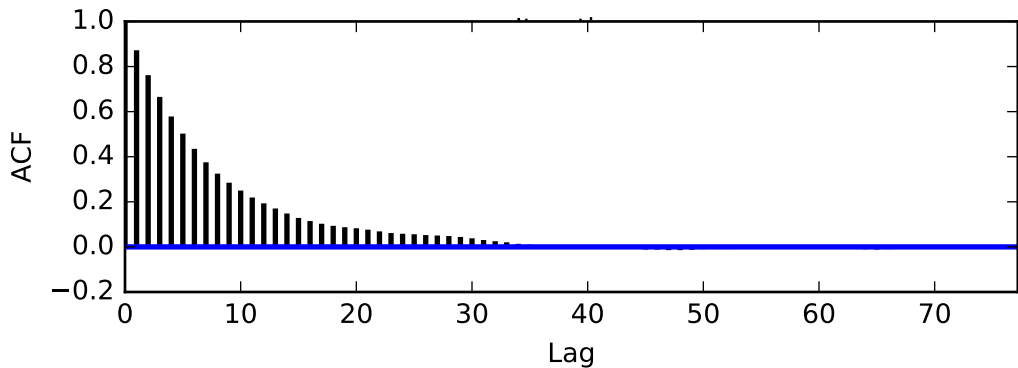

Supplement: Supplementary file 6 [file npg-25-145-2018-supplement.zip]

# Convergence of the analytical percentiles

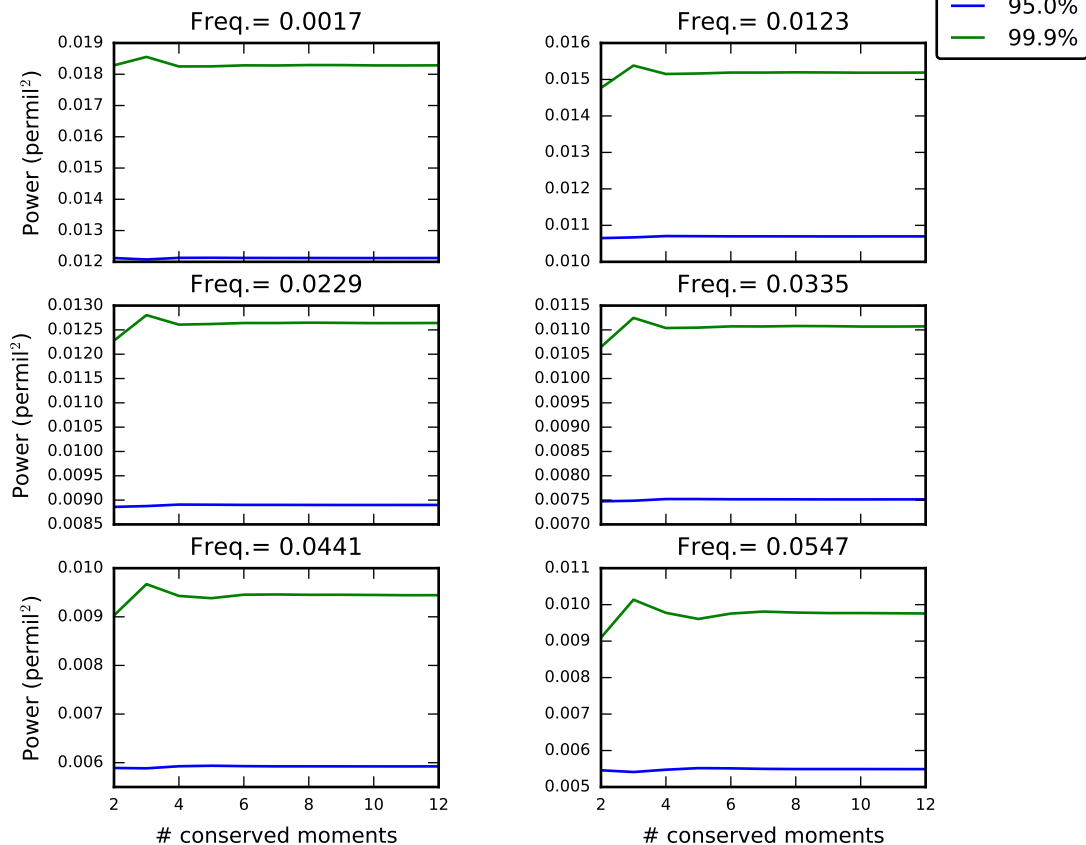

Supplement: Supplementary file 7 [file npg-25-145-2018-supplement.zip]

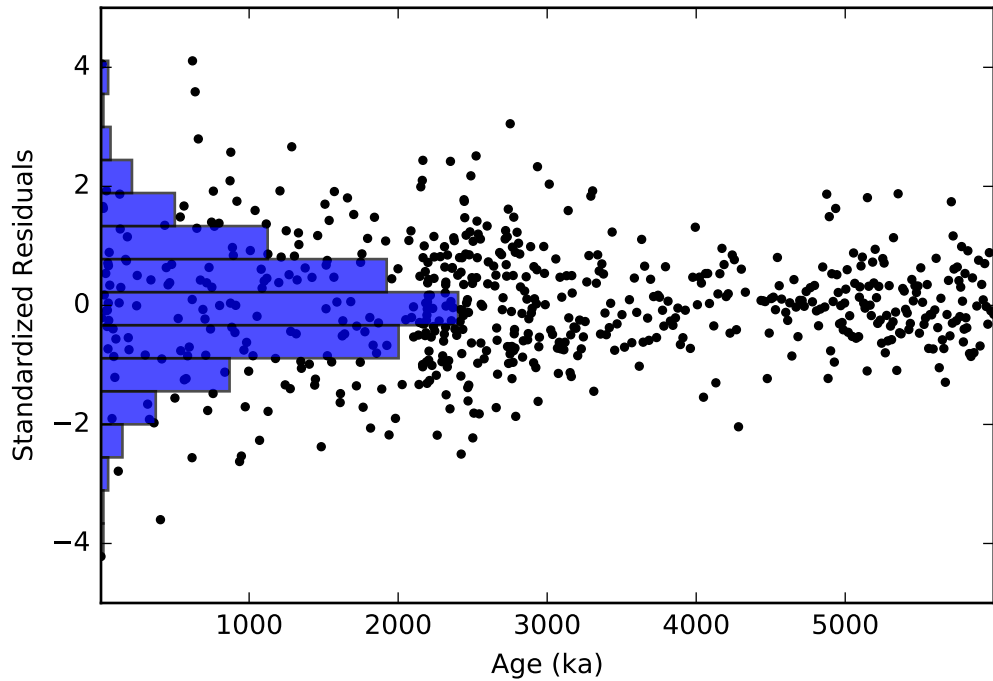

Supplement: Supplementary file 8 [file npg-25-145-2018-supplement.zip]

Age step in function of age

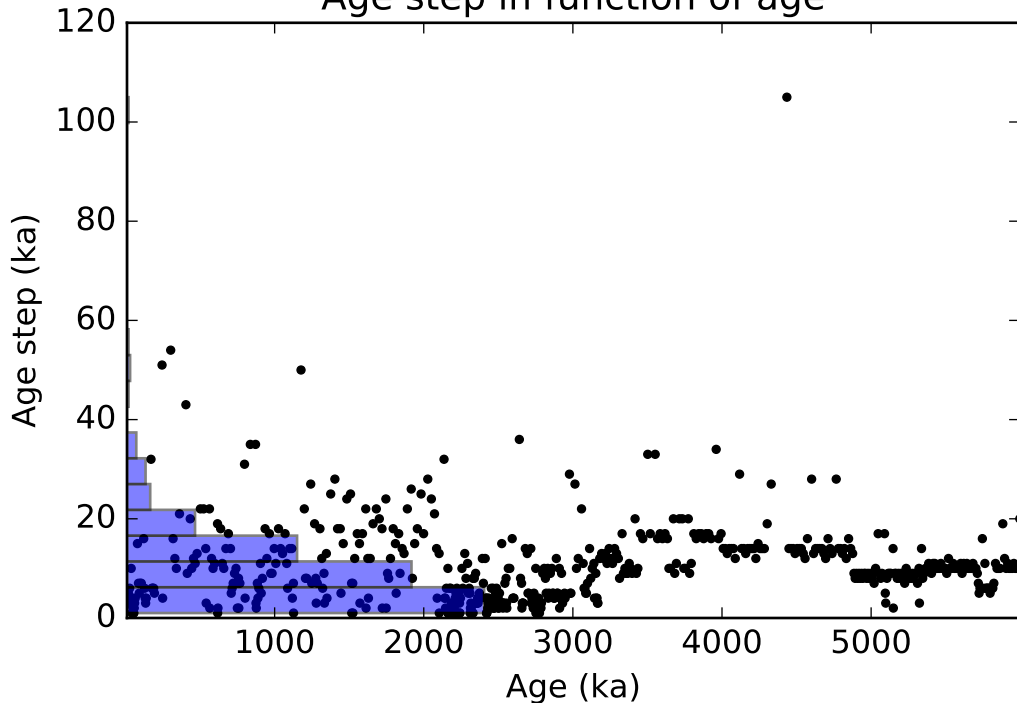

Supplement: Supplementary file 9 [file npg-25-145-2018-supplement.zip]

# WOSA segmentation

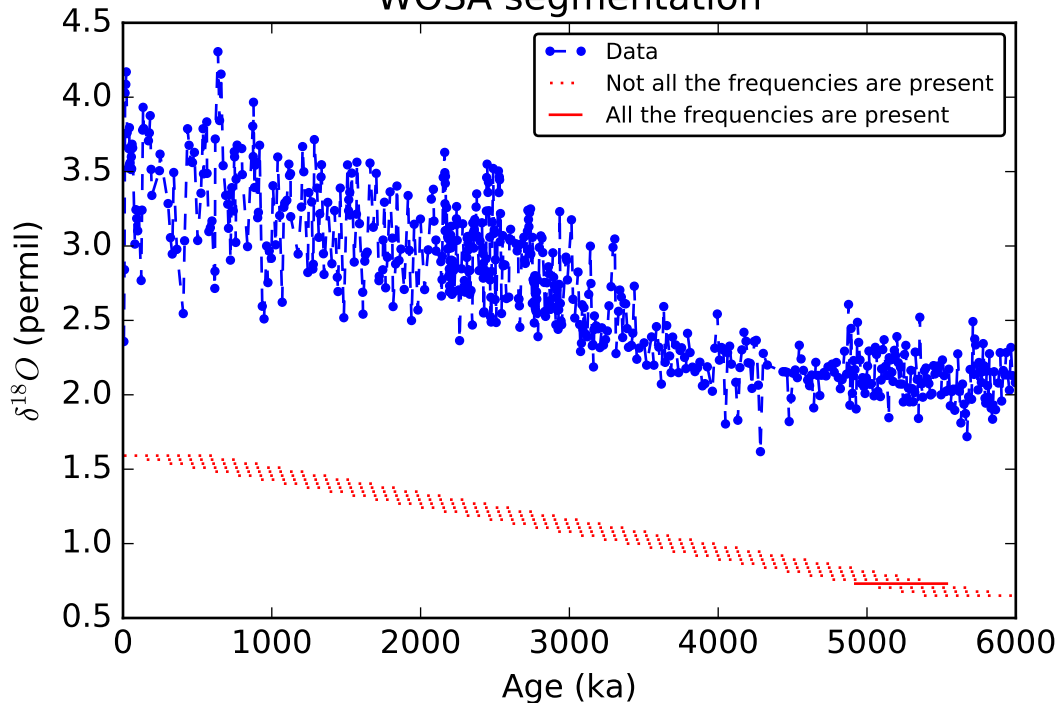

Supplement: Supplementary file 10 [file npg-25-145-2018-supplement.zip]

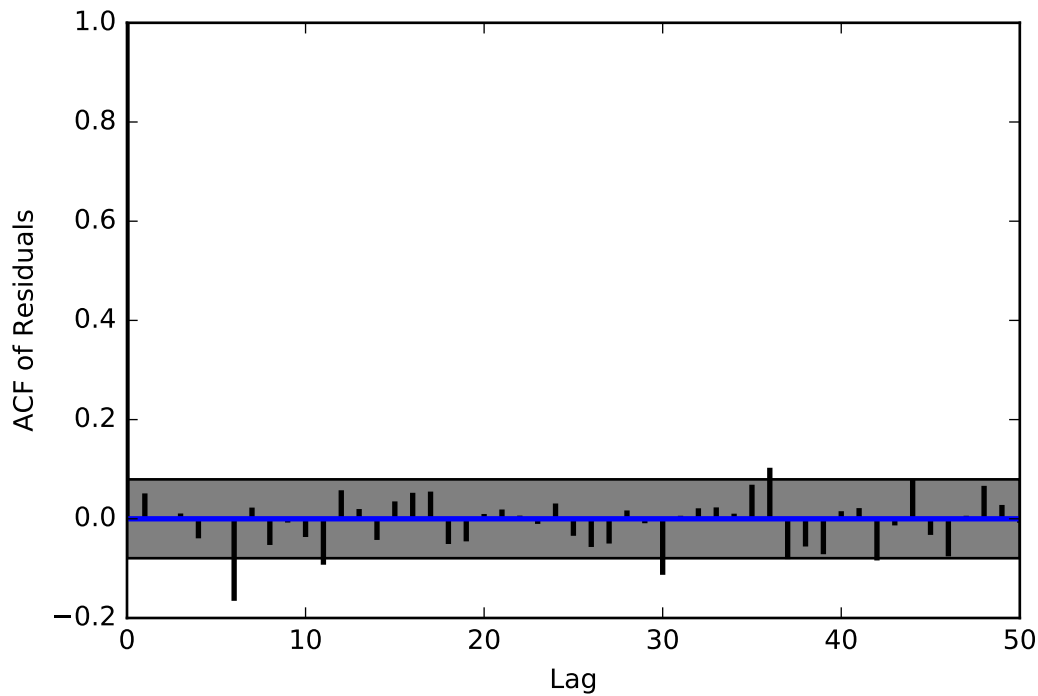

Supplement: Supplementary file 11 [file npg-25-145-2018-supplement.zip]

Marginal distribution of  $\sigma$

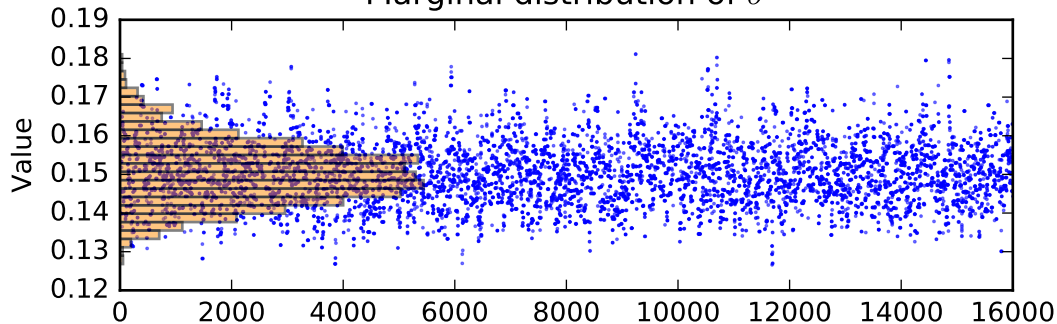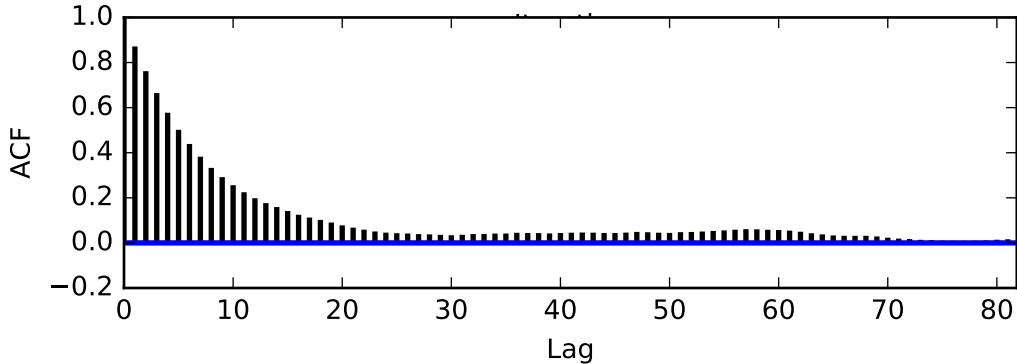

Supplement: Supplementary file 12 [file npg-25-145-2018-supplement.zip]

# WOSA periodogram and confidence levels

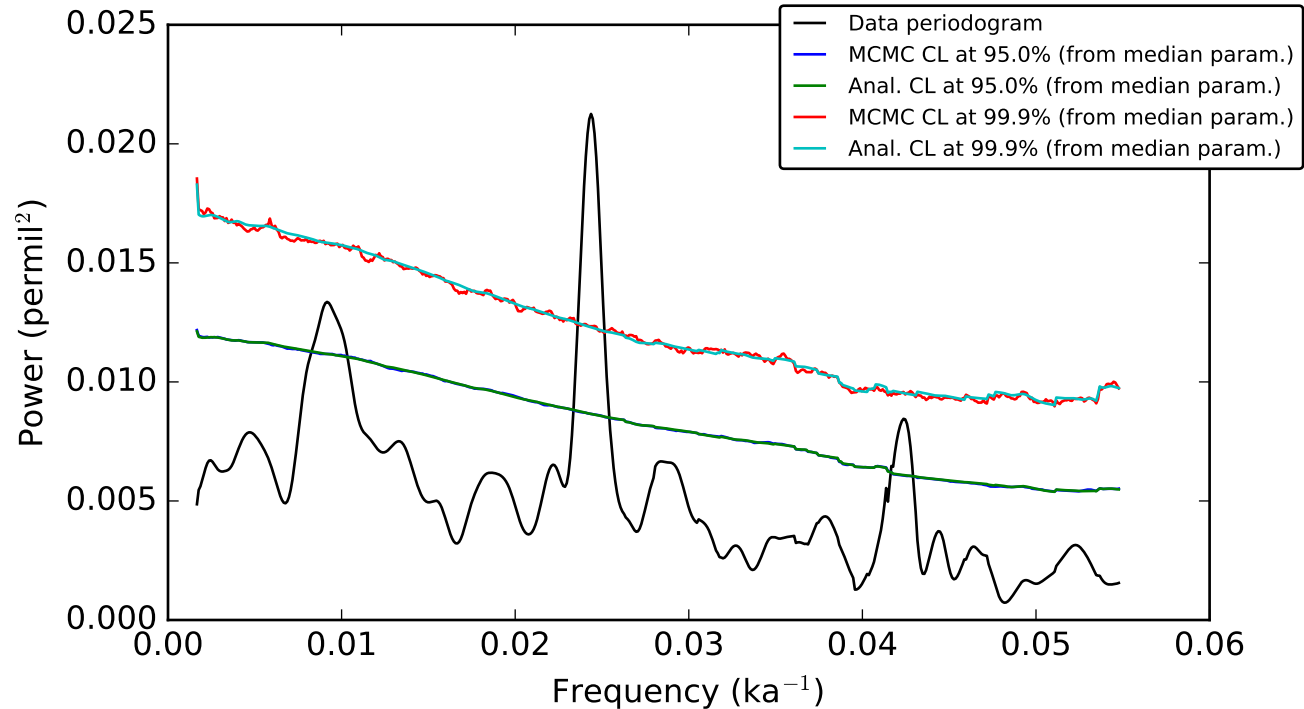

Supplement: Supplementary file 13 [file npg-25-145-2018-supplement.zip]

Polynomial trends of different degrees

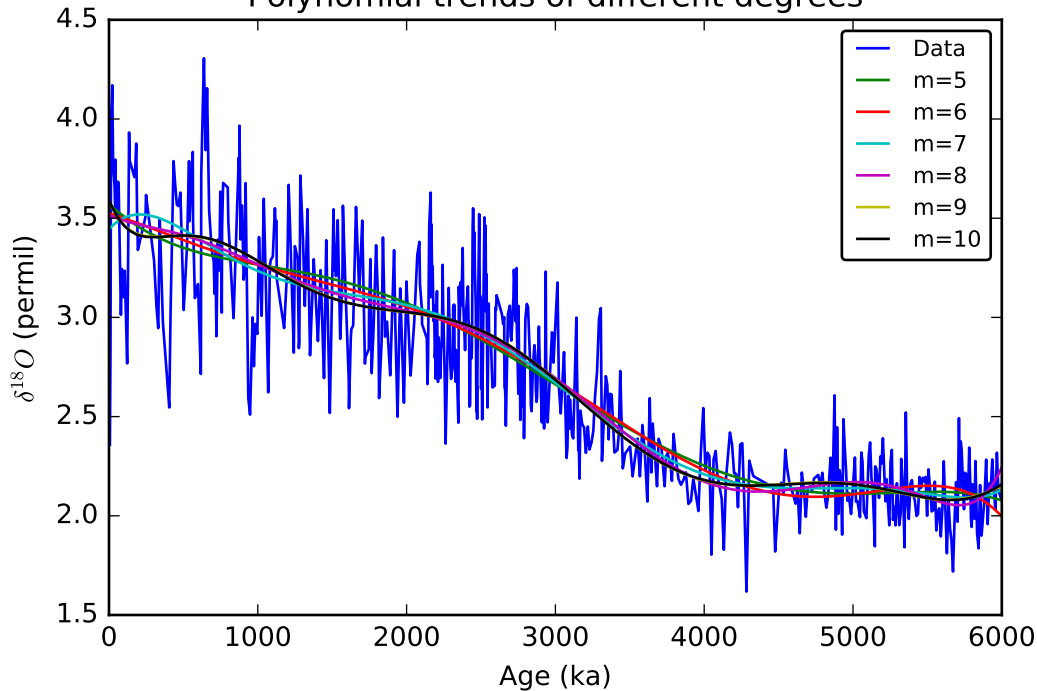

Supplement: Supplementary file 14 [file npg-25-145-2018-supplement.zip]

Analytical variance of the WOSA periodogram  
for the background noise

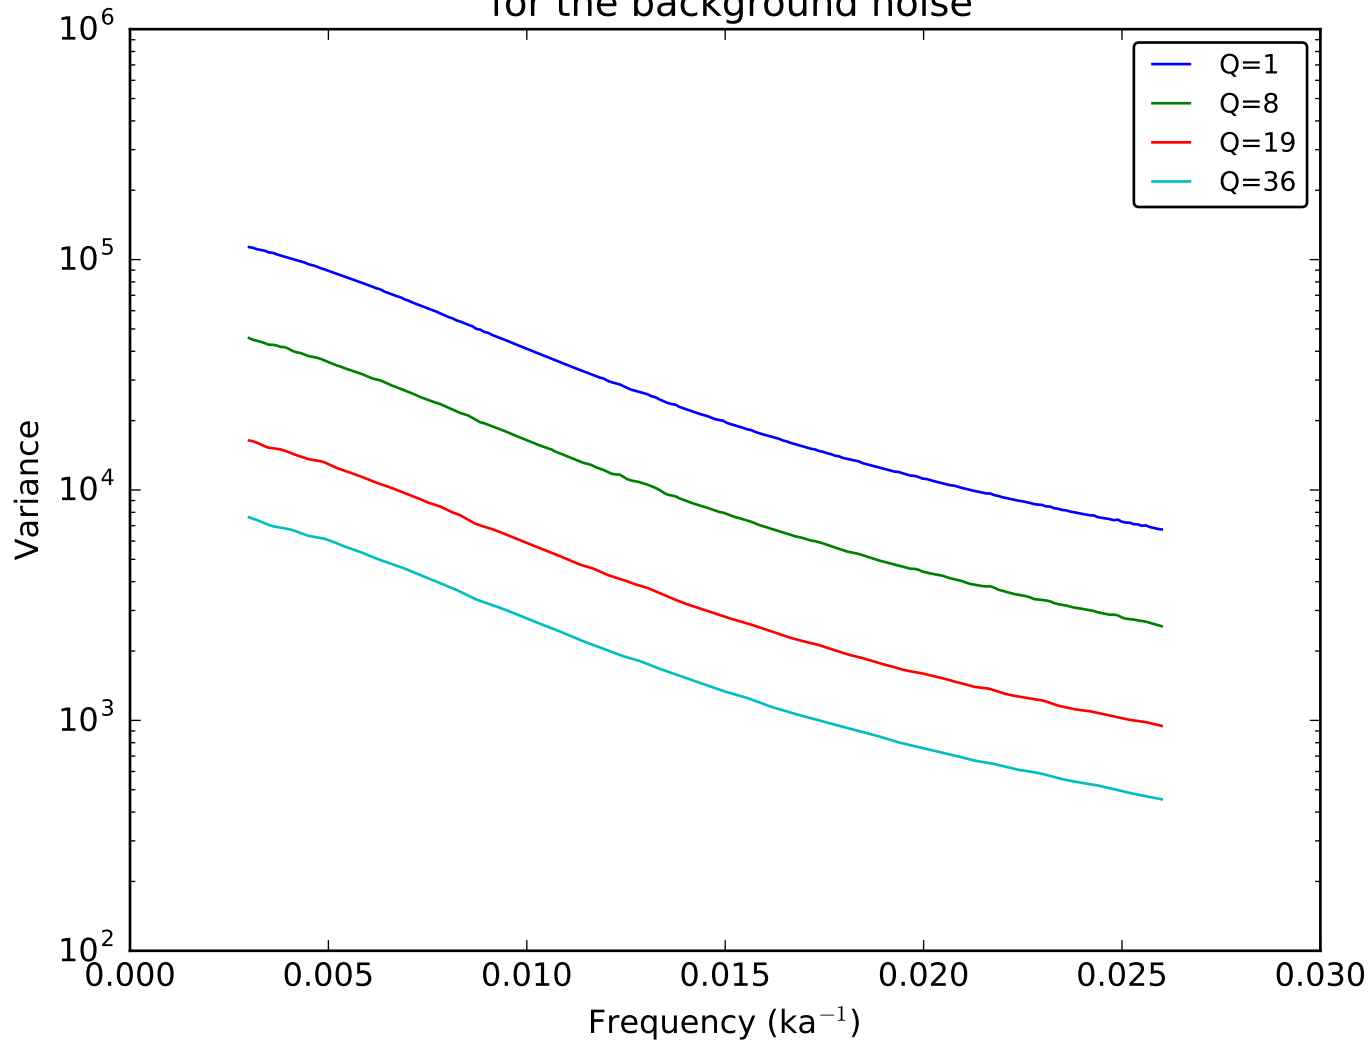

Supplement: Supplementary file 15 [file npg-25-145-2018-supplement.zip]

ACF of Sqrd. Resid.

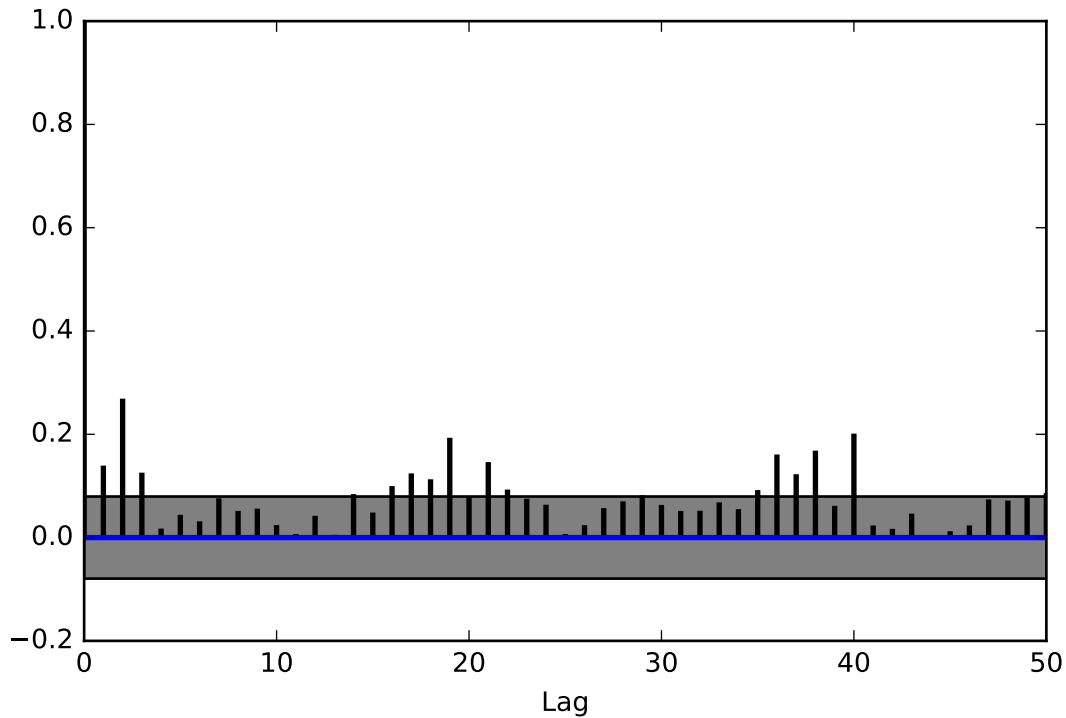

Supplement: Supplementary file 16 [file npg-25-145-2018-supplement.zip]

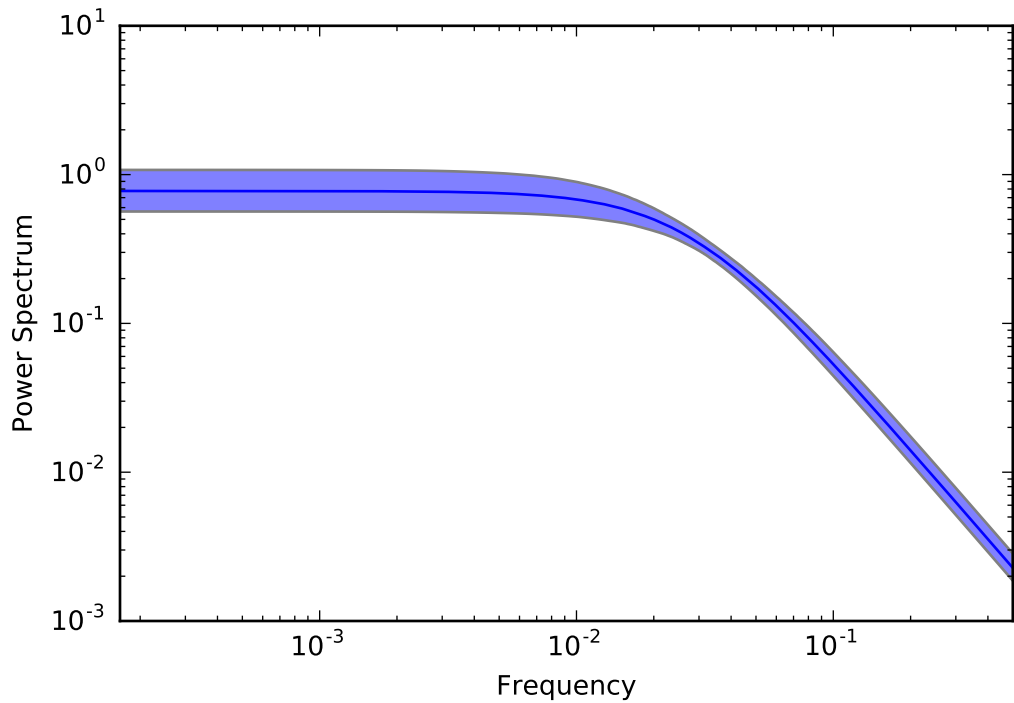

Supplement: Supplementary file 17 [file npg-25-145-2018-supplement.zip]

# WOSA periodogram and confidence levels

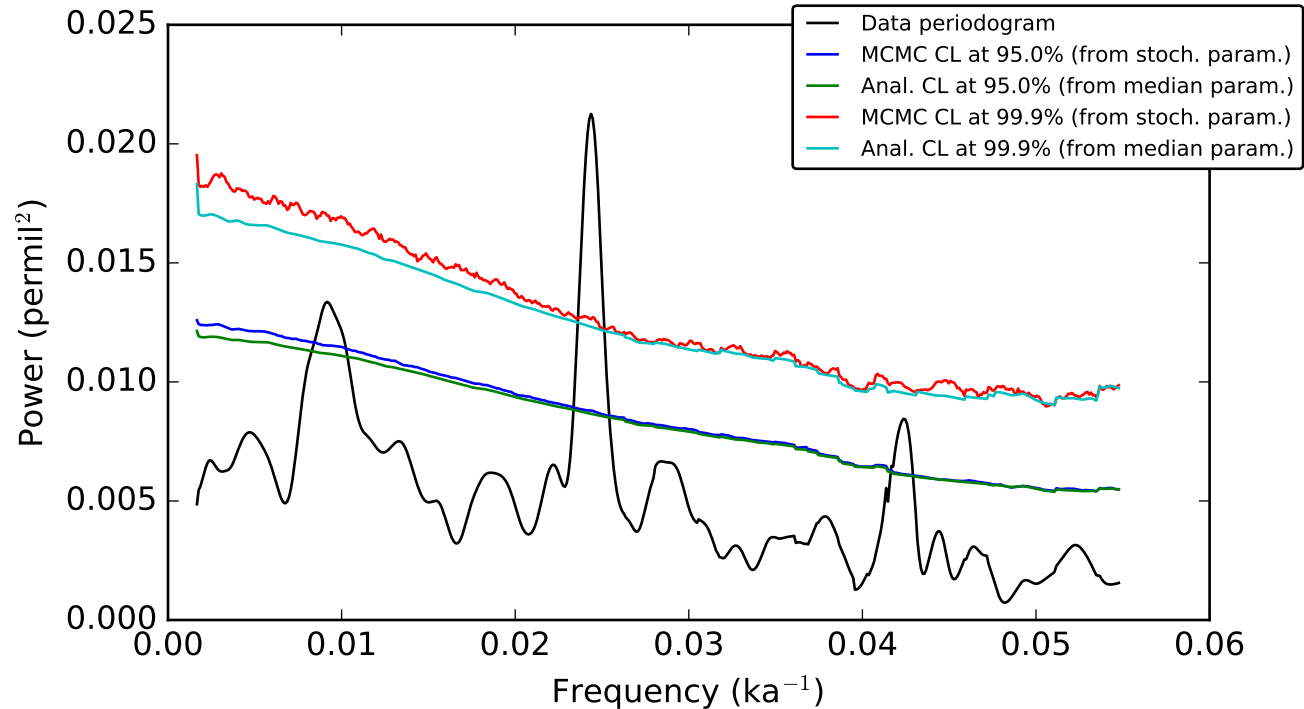

Supplement: Supplementary file 18 [file npg-25-145-2018-supplement.zip]

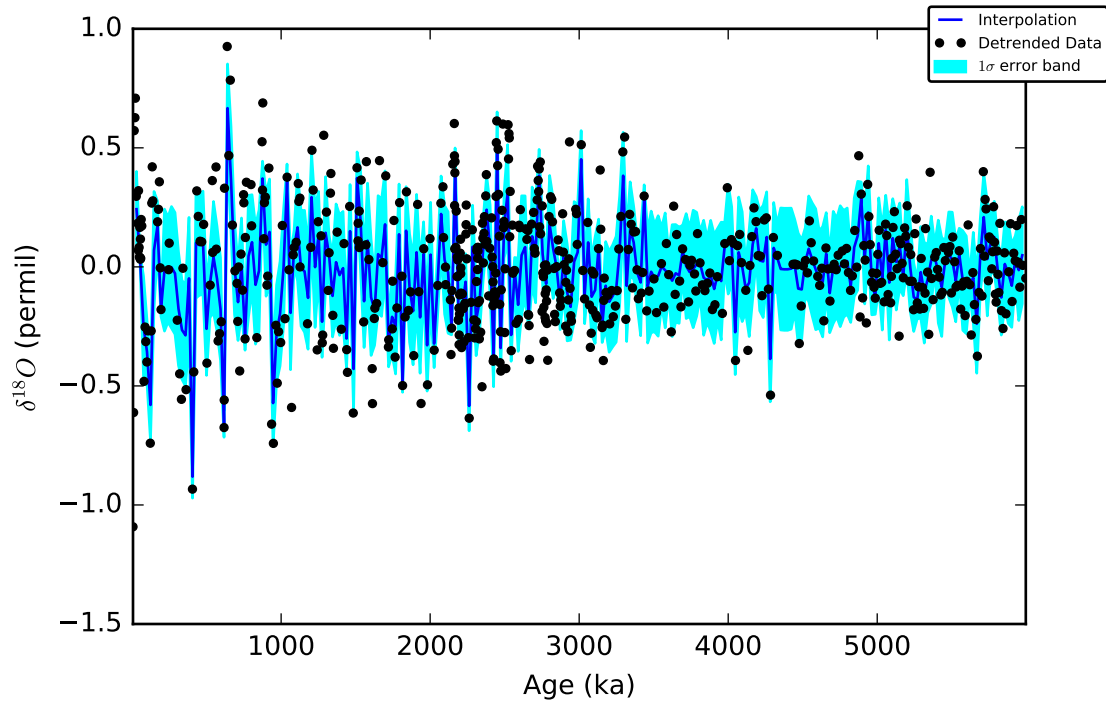

Supplement: Supplementary file 19 [file npg-25-145-2018-supplement.zip]

Normalized WOSA periodograms  
for different degrees of the trend

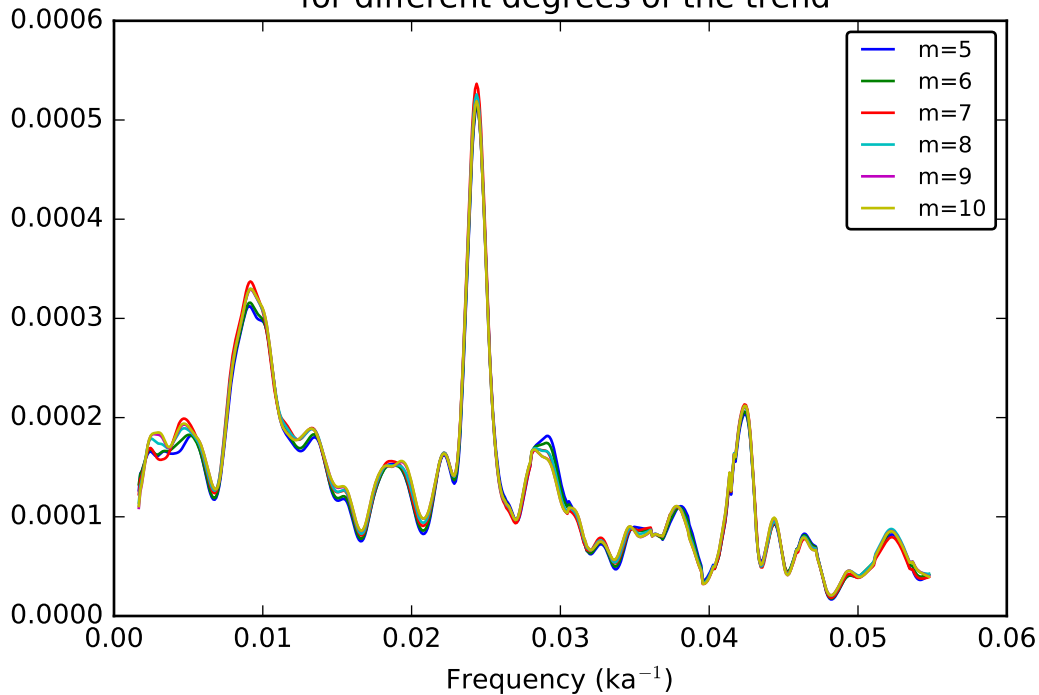

Supplement: Supplementary file 20 [file npg-25-145-2018-supplement.zip]

Marginal distribution of  $\mu$

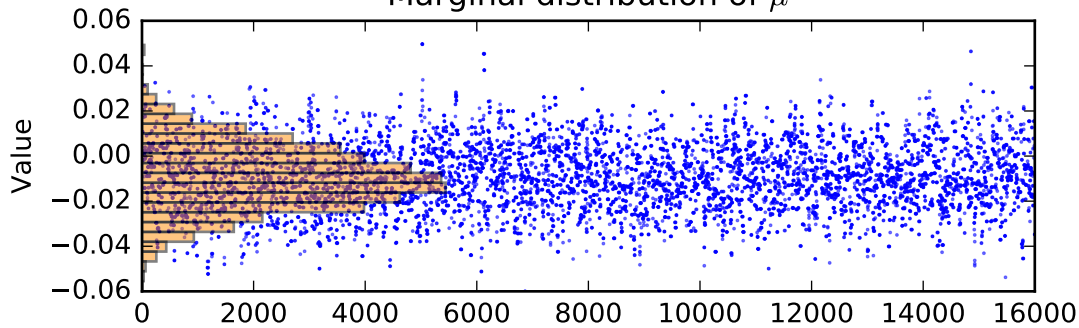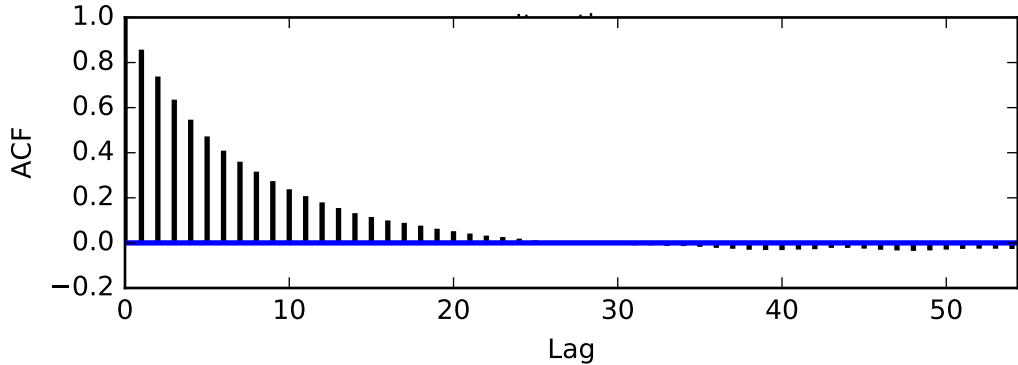

Supplement: Supplementary file 21 [file npg-25-145-2018-supplement.zip]

Marginal distribution of  $\log(\alpha)$

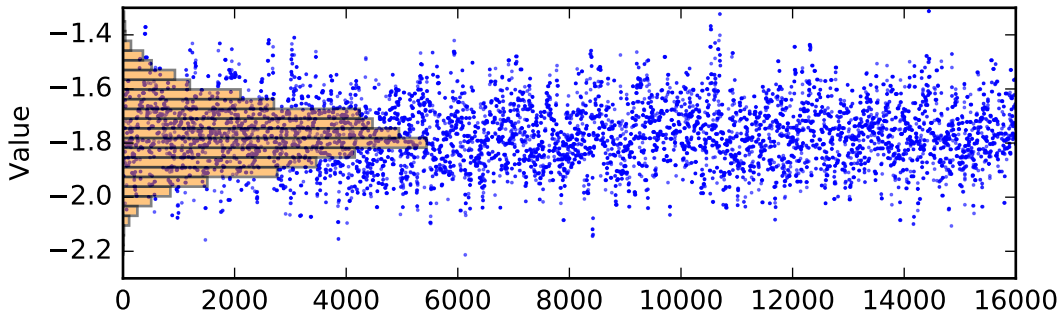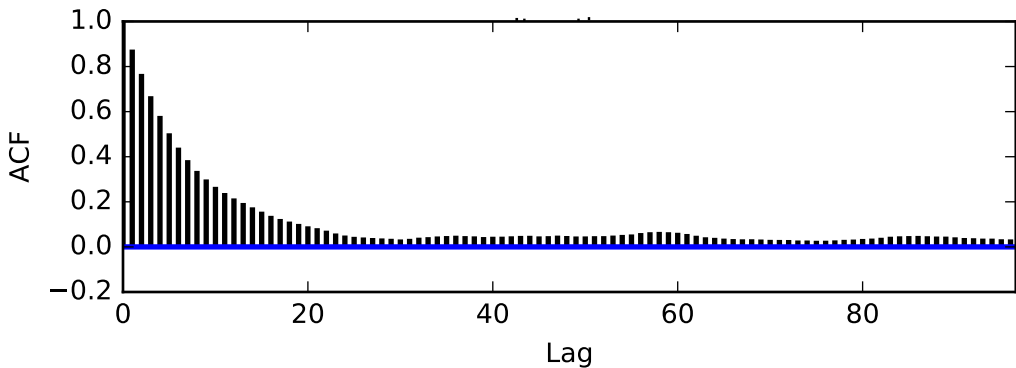

Supplement: Supplementary file 22 [file npg-25-145-2018-supplement.zip]

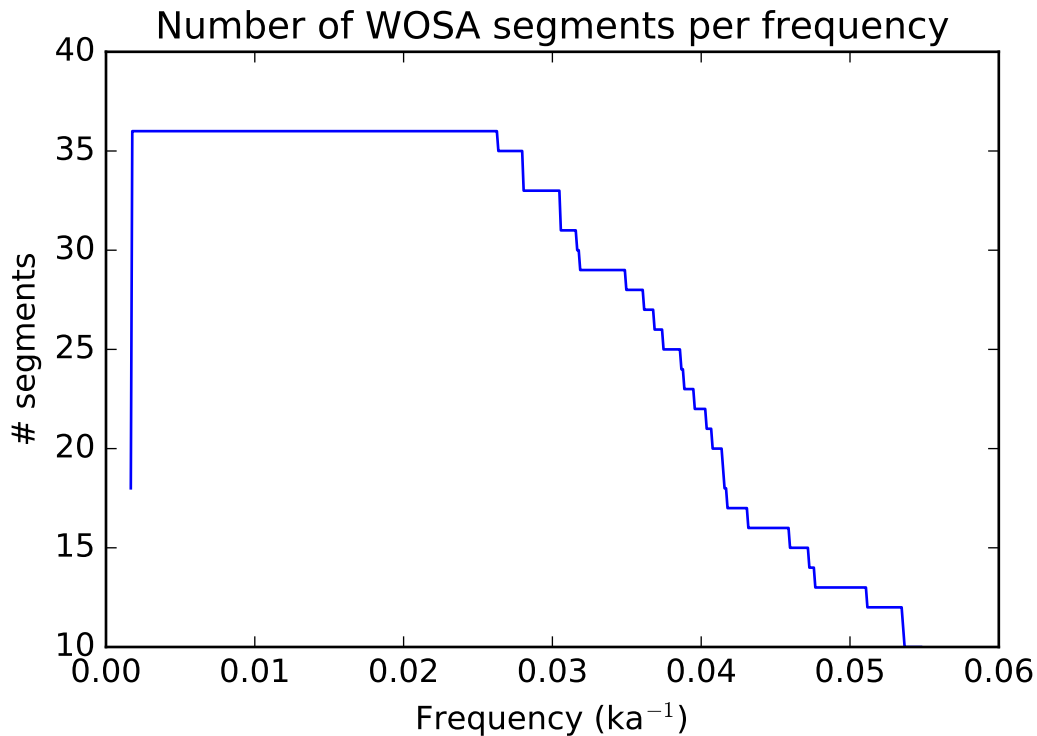

Supplement: Supplementary file 23 [file npg-25-145-2018-supplement.zip]
